# Supplementary material for: Greener hydrocarbons: maximizing efficiency in the electro-catalytic upgrading of n -caproic acid to renewable fuels
Source: Royal Society of Chemistry journal article supplement (doi:10.1039/d5ra08929h), 2026-01-01
Supplement: d5ra08929h2.pdf [file d5ra08929h2.pdf]

**Table S1.** When assuming that the coulombic efficiency of the carboxylic acid is 100%, the amount of charge that needs to be transferred over time ( $Q_t$ ) for the reactions of *n*-caproic acid at different concentrations using eqn (4-6). The FE was set with the range of 0.25 to 1.00.

| Concentration (mM) | $Q_t$ (C) |         |         |         |
|--------------------|-----------|---------|---------|---------|
|                    | 0.25 FE   | 0.50 FE | 0.75 FE | 1.00 FE |
| 50                 | 120.6     | 241.2   | 361.8   | 482.4   |
| 100                | 241.2     | 482.5   | 723.6   | 964.9   |
| 200                | 482.4     | 964.9   | 1447.3  | 1929.7  |
| 300                | 723.7     | 1447.3  | 2171.1  | 2894.6  |
| 400                | 964.9     | 1929.7  | 2894.6  | 3859.4  |
| 500                | 1206.1    | 2412.2  | 3618.3  | 4824.3  |
| 600                | 1447.3    | 2894.6  | 4331.9  | 5789.1  |
| 700                | 1688.5    | 3377.0  | 5065.5  | 6754.0  |
| 800                | 1929.7    | 3859.4  | 5789.1  | 7718.8  |
| 1000               | 2412.1    | 4824.3  | 7236.4  | 9648.5  |
| 1500               | 3618.2    | 7236.4  | 10854.6 | 14472.8 |

**Table S2.** Coulombic efficiency (CE) on different faraday equivalent (FE) and various concentrations of *n*-caproic acid for the Kolbe electrolysis reaction.

| Parameters | Concentrations (mM) |        |        |        |        |        |        |        |        |
|------------|---------------------|--------|--------|--------|--------|--------|--------|--------|--------|
|            | 50                  | 100    | 200    | 300    | 400    | 500    | 600    | 700    | 800    |
| 0.25 FE    | 61.95%              | 72.17% | 71.70% | 81.61% | 88.54% | 73.92% | 84.65% | 96.82% | 66.70% |
| 0.50 FE    | 46.74%              | 52.88% | 58.81% | 63.43% | 63.44% | 61.83% | 65.46% | 64.41% | 70.89% |
| 0.75 FE    | 44.82%              | 48.87% | 50.92% | 46.43% | 50.75% | 44.71% | 49.51% | 60.55% | 58.56% |
| 1.00 FE    | 41.92%              | 36.87% | 30.21% | 45.12% | 38.94% | 25.62% | 35.26% | 45.95% | 30.83% |
| Average FE | 51.14%              | 52.70% | 52.91% | 59.15% | 60.42% | 50.51% | 58.72% | 66.93% | 56.75% |

Table S3. Experimental data of 800 mM *n*-caproic acid at different pH values after 1.00 FE electrolysis ( $n \geq 3$ ).

| Parameters                                                                                 | pH values       |                  |                |
|--------------------------------------------------------------------------------------------|-----------------|------------------|----------------|
|                                                                                            | 5.86            | 6.92             | 9.60           |
| Input charge number (cc)                                                                   |                 | 7718.8           |                |
| Electrolysis time (s)                                                                      | 36376           | 28825            | 27506          |
| Electric energy consumption (Wh)                                                           |                 | 7.51             |                |
| $iR$ (V)                                                                                   | 0.65            | 0.73             | 0.74           |
| <i>n</i> -Decane production (mg)                                                           | 2948.76         | 2905.02          | 2381.25        |
| The amount of <i>n</i> -decane produced per unit of electric energy (g kWh <sup>-1</sup> ) | 392.64          | 386.82           | 317.01         |
| $S_{\text{decane}}$ (%)                                                                    | 45.85           | 45.85            | 38.31          |
| FEff (%)                                                                                   | 51.9            | 51.2             | 41.9           |
| CE (%)                                                                                     | 69.30           | 68.20            | 66.85          |
| Total amount of generated gas (mL)                                                         | 1646.63         | 1737.11          | 1074.35        |
| H <sub>2</sub> (mL, %)                                                                     | 932.8 (56.65%)  | 1081.52 (62.24%) | 746.6 (69.48%) |
| O <sub>2</sub> (mL, %)                                                                     | 16.50 (1.05%)   | 15.88 (0.91%)    | 27.19 (2.53%)  |
| CO <sub>2</sub> (mL, %)                                                                    | 374.98 (22.77%) | 272.10 (15.66%)  | 96.83 (12.97%) |
